# Supplementary material for: Interrogating and Reflecting on Disability Prevalence Data Collected Using the Washington Group Tools: Results from Population-Based Surveys in Cameroon, Guatemala, India, Maldives, Nepal, Turkey and Vanuatu
Source: MDPI journal article supplement (doi:10.3390/ijerph18179213), 2021-08-31
Supplement: s1 [file s1]

**Table S1.** Washington Group Tools as used in each of the included surveys.

NB excludes optional questions included in survey but not in analyses

**1A. Extended Set on Functioning (ESF) as used in Cameroon, India and Guatemala**

| #       | Question                                                                                                                                                                                       | Response options                                               |
|---------|------------------------------------------------------------------------------------------------------------------------------------------------------------------------------------------------|----------------------------------------------------------------|
| VIS_1   | [Do/Does] [you/he/she] wear glasses or contact lenses?                                                                                                                                         | Yes, No                                                        |
| VIS_2   | [Do/Does] [you/he/she] have difficulty seeing, [If VIS_1 = 1: even when wearing [your/his/her] glasses/contact lenses ?                                                                        | No difficulty, some difficulty, a lot of difficulty, cannot do |
| HEAR_1  | [Do/Does] [you/he/she] use a hearing aid?                                                                                                                                                      | Yes, No                                                        |
| HEAR_2  | [Do/Does] [you/he/she] have difficulty hearing, [If HEAR_1 = 1: even when using a hearing aid(s)]?                                                                                             | No difficulty, some difficulty, a lot of difficulty, cannot do |
| MOB_1   | [Do/Does] [you/he/she] have difficulty walking or climbing steps?                                                                                                                              | No difficulty, some difficulty, a lot of difficulty, cannot do |
| MOB_2   | [Do/does] [you/he/she] use any equipment or receive help for getting around?                                                                                                                   | Yes, No                                                        |
| MOB_MOD | [if MOB_2 = 1] [Do/does] [you/he/she] have difficulty walking or climbing steps, even when using your equipment or with help?                                                                  | No difficulty, some difficulty, a lot of difficulty, cannot do |
| COG_SS  | [Do/does] [you/he/she] have difficulty remembering or concentrating?                                                                                                                           | No difficulty, some difficulty, a lot of difficulty, cannot do |
| SC_SS   | [Do/does] [you/he/she] have difficulty with self-care, such as washing all over or dressing?                                                                                                   | No difficulty, some difficulty, a lot of difficulty, cannot do |
| COM_SS  | Using [your/his/her] usual language, [do/does] [you/he/she] have difficulty communicating, for example understanding or being understood?                                                      | No difficulty, some difficulty, a lot of difficulty, cannot do |
| UB_1    | [Do/Does] [you/he/she] have difficulty raising a 2 liter bottle of water or soda from waist to eye level?                                                                                      | No difficulty, some difficulty, a lot of difficulty, cannot do |
| UB_2    | [Do/Does] [you/he/she] have difficulty using [your/his/her] hands and fingers, such as picking up small objects, for example, a button or pencil, or opening or closing containers or bottles? | No difficulty, some difficulty, a lot of difficulty, cannot do |
| ANX_1   | How often [do/does] [you/he/she] feel worried, nervous or anxious?                                                                                                                             | Daily, weekly, monthly, a few times a year, never              |
| ANX_2   | Thinking about the last time [you/he/she] felt worried, nervous or anxious, how would [you/he/she] describe the level of these feelings?                                                       | A little, a lot, somewhere between a little and a lot          |
| DEP_1   | How often [do/does] [you/he/she] feel depressed?                                                                                                                                               | Daily, weekly, monthly, a few times a year, never              |
| DEP_2   | Thinking about the last time [you/he/she] felt depressed, how depressed did [you/he/she] feel?                                                                                                 | A little, a lot, somewhere between a little and a lot          |
| PAIN_1  | In the past 3 months, how often did [you/he/she] have pain?                                                                                                                                    | Never, some days, most days, every day                         |
| PAIN_2  | Thinking about the last time [you/he/she] had pain, how much pain did [you/he/she] have?                                                                                                       | A little, a lot, somewhere between a little and a lot          |
| TIRED_1 | In the past 3 months, how often did [you/he/she] feel very tired or exhausted?                                                                                                                 | Never, some days, most days, every day                         |
| TIRED_2 | Thinking about the last time [you/he/she] felt very tired or exhausted, how long did it last?                                                                                                  | Some of the day, most of the day, all of the day               |
| TIRED_3 | Thinking about the last time [you/he/she] felt this way, how would you describe the level of tiredness?                                                                                        | A little, a lot, somewhere between a little and a lot          |

**1B Short Set Enhanced (SS-E) as used in Nepal and Maldives**

| #      | Question                                                                                                                | Response options                                               |
|--------|-------------------------------------------------------------------------------------------------------------------------|----------------------------------------------------------------|
| VIS_1  | [Do/Does] [you/he/she] wear glasses or contact lenses?                                                                  | Yes, No                                                        |
| VIS_2  | [Do/Does] [you/he/she] have difficulty seeing, [If VIS_1 = 1: even when wearing [your/his/her] glasses/contact lenses ? | No difficulty, some difficulty, a lot of difficulty, cannot do |
| HEAR_1 | [Do/Does] [you/he/she] use a hearing aid?                                                                               | Yes, No                                                        |
| HEAR_2 | [Do/Does] [you/he/she] have difficulty hearing, [If HEAR_1 = 1: even when using a hearing aid(s)]?                      | No difficulty, some difficulty, a lot of difficulty, cannot do |

|         |                                                                                                                                                                                                |                                                                |
|---------|------------------------------------------------------------------------------------------------------------------------------------------------------------------------------------------------|----------------------------------------------------------------|
| MOB_1   | [Do/Does] [you/he/she] have difficulty walking or climbing steps?                                                                                                                              | No difficulty, some difficulty, a lot of difficulty, cannot do |
| MOB_2   | [Do/does] [you/he/she] use any equipment or receive help for getting around?                                                                                                                   | Yes, No                                                        |
| MOB_MOD | [if MOB_2 = 1] [Do/does] [you/he/she] have difficulty walking or climbing steps, even when using your equipment or with help?                                                                  | No difficulty, some difficulty, a lot of difficulty, cannot do |
| COG_SS  | [Do/does] [you/he/she] have difficulty remembering or concentrating?                                                                                                                           | No difficulty, some difficulty, a lot of difficulty, cannot do |
| SC_SS   | [Do/does] [you/he/she] have difficulty with self-care, such as washing all over or dressing?                                                                                                   | No difficulty, some difficulty, a lot of difficulty, cannot do |
| COM_SS  | Using [your/his/her] usual language, [do/does] [you/he/she] have difficulty communicating, for example understanding or being understood?                                                      | No difficulty, some difficulty, a lot of difficulty, cannot do |
| UB_1    | [Do/Does] [you/he/she] have difficulty raising a 2 liter bottle of water or soda from waist to eye level?                                                                                      | No difficulty, some difficulty, a lot of difficulty, cannot do |
| UB_2    | [Do/Does] [you/he/she] have difficulty using [your/his/her] hands and fingers, such as picking up small objects, for example, a button or pencil, or opening or closing containers or bottles? | No difficulty, some difficulty, a lot of difficulty, cannot do |
| ANX_1   | How often [do/does] [you/he/she] feel worried, nervous or anxious?                                                                                                                             | Daily, weekly, monthly, a few times a year, never              |
| ANX_2   | Thinking about the last time [you/he/she] felt worried, nervous or anxious, how would [you/he/she] describe the level of these feelings?                                                       | A little, a lot, somewhere between a little and a lot          |
| DEP_1   | How often [do/does] [you/he/she] feel depressed?                                                                                                                                               | Daily, weekly, monthly, a few times a year, never              |
| DEP_2   | Thinking about the last time [you/he/she] felt depressed, how depressed did [you/he/she] feel?                                                                                                 | A little, a lot, somewhere between a little and a lot          |

### 1C Short Set Enhanced (SS-E) as used in Turkey

| #      | Question                                                                                                                                                                                       | Response options                                               |
|--------|------------------------------------------------------------------------------------------------------------------------------------------------------------------------------------------------|----------------------------------------------------------------|
| VIS_1  | [Do/Does] [you/he/she] wear glasses or contact lenses?                                                                                                                                         | Yes, No                                                        |
| VIS_2  | [Do/Does] [you/he/she] have difficulty seeing, [If VIS_1 = 1: even when wearing [your/his/her] glasses/contact lenses ?                                                                        | No difficulty, some difficulty, a lot of difficulty, cannot do |
| HEAR_1 | [Do/Does] [you/he/she] use a hearing aid?                                                                                                                                                      | Yes, No                                                        |
| HEAR_2 | [Do/Does] [you/he/she] have difficulty hearing, [If HEAR_1 = 1: even when using a hearing aid(s)]?                                                                                             | No difficulty, some difficulty, a lot of difficulty, cannot do |
| MOB_SS | [Do/Does] [you/he/she] have difficulty walking or climbing steps?                                                                                                                              | No difficulty, some difficulty, a lot of difficulty, cannot do |
| COG_SS | [Do/does] [you/he/she] have difficulty remembering or concentrating?                                                                                                                           | No difficulty, some difficulty, a lot of difficulty, cannot do |
| SC_SS  | [Do/does] [you/he/she] have difficulty with self-care, such as washing all over or dressing?                                                                                                   | No difficulty, some difficulty, a lot of difficulty, cannot do |
| COM_SS | Using [your/his/her] usual language, [do/does] [you/he/she] have difficulty communicating, for example understanding or being understood?                                                      | No difficulty, some difficulty, a lot of difficulty, cannot do |
| UB_1   | [Do/Does] [you/he/she] have difficulty raising a 2 liter bottle of water or soda from waist to eye level?                                                                                      | No difficulty, some difficulty, a lot of difficulty, cannot do |
| UB_2   | [Do/Does] [you/he/she] have difficulty using [your/his/her] hands and fingers, such as picking up small objects, for example, a button or pencil, or opening or closing containers or bottles? | No difficulty, some difficulty, a lot of difficulty, cannot do |
| ANX_1  | How often [do/does] [you/he/she] feel worried, nervous or anxious?                                                                                                                             | Daily, weekly, monthly, a few times a year, never              |
| ANX_2  | Thinking about the last time [you/he/she] felt worried, nervous or anxious, how would [you/he/she] describe the level of these feelings?                                                       | A little, a lot, somewhere between a little and a lot          |
| DEP_1  | How often [do/does] [you/he/she] feel depressed?                                                                                                                                               | Daily, weekly, monthly, a few times a year, never              |
| DEP_2  | Thinking about the last time [you/he/she] felt depressed, how depressed did [you/he/she] feel?                                                                                                 | A little, a lot, somewhere between a little and a lot          |

## 1D. Labour Force Disability Module as used in Vanuatu

| #                                                                        | Question                                                                                                                                  | Response options                                               |
|--------------------------------------------------------------------------|-------------------------------------------------------------------------------------------------------------------------------------------|----------------------------------------------------------------|
| VIS_SS                                                                   | [Do/Does] [you/he/she] have difficulty seeing, even if wearing glasses?                                                                   | No difficulty, some difficulty, a lot of difficulty, cannot do |
| HEAR_SS                                                                  | [Do/Does] [you/he/she] have difficulty hearing, even if using a hearing aid(s)?                                                           | No difficulty, some difficulty, a lot of difficulty, cannot do |
| MOB_SS                                                                   | [Do/Does] [you/he/she] have difficulty walking or climbing steps?                                                                         | No difficulty, some difficulty, a lot of difficulty, cannot do |
| COG_SS                                                                   | [Do/does] [you/he/she] have difficulty remembering or concentrating?                                                                      | No difficulty, some difficulty, a lot of difficulty, cannot do |
| SC_SS                                                                    | [Do/does] [you/he/she] have difficulty with self-care, such as washing all over or dressing?                                              | No difficulty, some difficulty, a lot of difficulty, cannot do |
| COM_SS                                                                   | Using [your/his/her] usual language, [do/does] [you/he/she] have difficulty communicating, for example understanding or being understood? | No difficulty, some difficulty, a lot of difficulty, cannot do |
| <i>Below questions only asked of those who self reported (not proxy)</i> |                                                                                                                                           |                                                                |
| ANX_1                                                                    | How often do you feel worried, nervous or anxious?                                                                                        | Daily, weekly, monthly, a few times a year, never              |
| ANX_2                                                                    | Thinking about the last time you felt worried, nervous or anxious, how would [you/he/she] describe the level of these feelings?           | A little, a lot, somewhere between a little and a lot          |
| DEP_1                                                                    | How often do you feel depressed?                                                                                                          | Daily, weekly, monthly, a few times a year, never              |
| DEP_2                                                                    | Thinking about the last time you felt depressed, how depressed did you feel?                                                              | A little, a lot, somewhere between a little and a lot          |

## Supplementary Material: Table S2

| Table S2: Prevalence of functional limitations among subpopulations with and without assistive products |                           |                           |                           |                         |                         |                         |
|---------------------------------------------------------------------------------------------------------|---------------------------|---------------------------|---------------------------|-------------------------|-------------------------|-------------------------|
|                                                                                                         | Cameroon<br>(n=1617)      | Guatemala<br>(n=8910)     | India (n=2350)            | Nepal<br>(n=4067)       | Maldives<br>(n=3592)    | Turkey (n=1554)         |
|                                                                                                         | % (95% CI)                | % (95% CI)                | % (95% CI)                | % (95% CI)              | % (95% CI)              | % (95% CI)              |
| <b>Wears glasses</b>                                                                                    | <b>5.5 (4.1 – 6.9)</b>    | <b>12.3 (11.0 – 13.5)</b> | <b>10.0 (8.1 – 11.8)</b>  | <b>11.8 (10.8-12.8)</b> | <b>33.3 (31.8-34.9)</b> | <b>16.4 (14.3-18.8)</b> |
| Some or greater difficulty seeing, while wearing glasses                                                | 41.4 (27.7 – 55.1)        | 26.3 (23.1 – 29.6)        | 50.2 (42.6 – 57.9)        | 20.0 (16.7-23.8)        | 19.6 (17.5-21.9)        | 45.1 (37.9-52.4)        |
| A lot or greater difficulty, while wearing glasses                                                      | 1.0 (0.0 – 3.1)           | 4.3 (3.0 – 5.6)           | 3.9 (1.2 – 6.6)           | 0.8 (0.3-2.2)           | 2.2 (1.5-3.2)           | 7.1 (4.2-11.4)          |
| <b>Does not wear glasses</b>                                                                            | <b>94.5 (93.1 – 95.9)</b> | <b>87.7 (86.5 – 89.0)</b> | <b>90.0 (88.2 – 91.9)</b> | <b>88.2 (87.2-89.2)</b> | <b>66.7 (65.1-68.2)</b> | 83.5 (81.1-85.7)        |
| Some or greater difficulty seeing                                                                       | 28.2 (25.6 – 30.8)        | 25.7 (24.3 – 27.1)        | 32.5 (29.6 – 35.3)        | 12.8 (11.8-14.0)        | 24.9 (23.2-26.7)        | 16.3 (13.9-18.9)        |
| A lot or greater difficulty seeing                                                                      | 1.5 (0.1 – 2.1)           | 3.0 (2.5 – 3.4)           | 3.6 (2.2 – 5.0)           | 0.6 (0.4-1.0)           | 2.0 (1.5-3.2)           | 2.7 (1.9-3.8)           |
| <b>Uses mobility equipment or assistance</b>                                                            | <b>9.7 (7.9 – 11.4)</b>   | <b>2.5 (2.1 – 2.9)</b>    | <b>4.3 (3.3 – 5.3)</b>    | <b>2.2 (1.8-2.7)</b>    | <b>2.0 (1.6-2.5)</b>    | -                       |
| Some or greater difficulty walking, using equipment/assistance                                          | 64.6 (55.5 – 73.5)        | 79.3 (73.6 – 84.9)        | 93.0 (88.2 – 97.8)        | 87.9 (79.4-93.2)        | 98.3 (88.8-99.8)        | -                       |
| A lot or greater difficulty walking, using equipment/assistance                                         | 16.7 (11.7 – 21.7)        | 49.5 (41.9 – 57.0)        | 53.0 (44.7 – 61.3)        | 47.3 (37.2-57.5)        | 73.8 (62.9-82.4)        | -                       |
| <b>Does not use mobility equipment or assistance</b>                                                    | <b>90.3 (88.6 – 92.1)</b> | <b>97.5 (97.1 – 97.9)</b> | <b>95.7 (94.7 – 96.6)</b> | <b>97.8 (97.3-98.2)</b> | <b>98.0 (97.5-98.4)</b> | -                       |
| Some or greater difficulty walking                                                                      | 33.8 (30.9 – 36.8)        | 7.5 (6.6 – 8.4)           | 26.4 (23.3 – 29.6)        | 8.5 (7.6-9.4)           | 16.9 (15.7-18.1)        | -                       |
| A lot or greater difficulty walking                                                                     | 1.8 (0.9 – 2.6)           | 1.6 (1.3 – 2.0)           | 2.6 (1.6 – 3.7)           | 1.0 (0.7-1.4)           | 2.5 (2.0-3.0)           | -                       |
| <b>Uses hearing aid<sup>‡</sup></b>                                                                     | <b>0.3 (0.0 – 0.9)</b>    | <b>0.4 (0.2 – 0.5)</b>    | <b>0.1 (0.0 – 0.3)</b>    | <b>0.3 (0.1-0.5)</b>    | <b>0.5 (0.3-0.8)</b>    | <b>0.6 (0.3-1.1)</b>    |

<sup>‡</sup>Insufficient data for further analyses
